# Supplementary material
Source: publisher site journal article supplement (https://www.spandidos-publications.com/6903/downloadSupplementary)

Figure S1. Appendix used as an external control for anaplastic lymphoma kinase immunohistochemistry analysis. Staining is observed in the ganglion cells of the myenteric plexus and dispersed axons, while no staining is visible in the smooth muscle cells or epithelium.

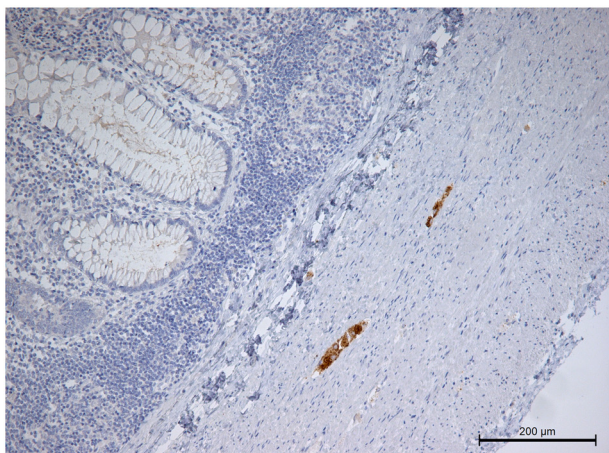

Figure S2. Data split of K-nearest neighbors classification (epidermal growth factor receptor vs. negative group).

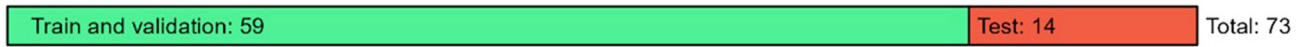

Figure S3. Receiver operating characteristic curves plot for classifier performance (EGFR vs. TN). EGFR, epidermal growth factor receptor; TN, negative group.

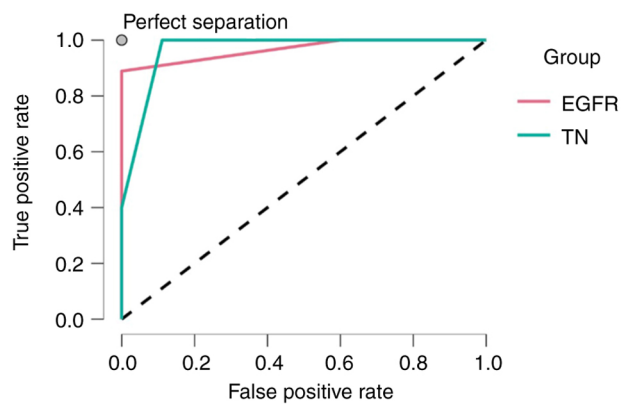

Figure S4. Data split of K-nearest neighborsclassification (anaplastic lymphoma kinase vs. negative group).

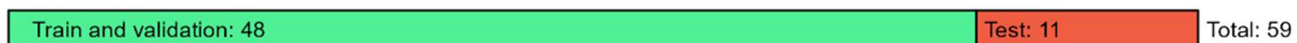

Figure S5. Receiver operating characteristic curves plot for classifier performance (ALK vs.TN). ALK, anaplastic lymphoma kinase; TN, negative group.

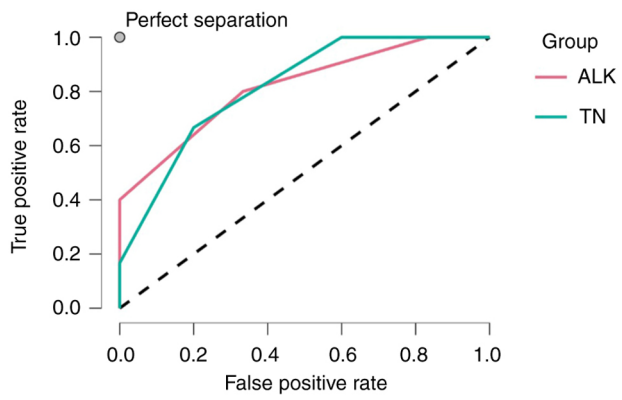

Figure S6. Data split of K-nearest neighborsclassification (anaplastic lymphoma kinase vs. epidermal growth factor receptor).

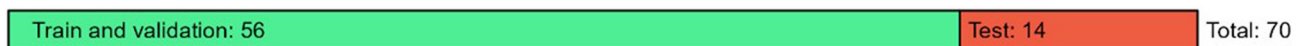

Figure S7. Receiver operating characteristic curves plot for classifier performance (ALK vs. EGFR). ALK, anaplastic lymphoma kinase; EGFR, epidermal growth factor receptor.

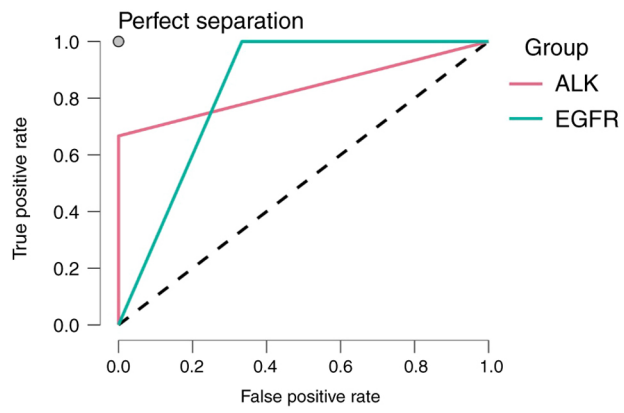

Supplement: Supplementary file 1 [file downloadSupplementary]
